# Supplementary material for: Protein digestibility and techno-functional performance of milk-alternative prototypes based on combinations of lentil and cereal protein
Source: Royal Society of Chemistry journal article supplement (doi:10.1039/d4fo04103h), 2024-01-01
Supplement: d4fo04103h4.pdf [file d4fo04103h4.pdf]

## Supplementary Material

Supplementary Table 1 Results of the sugar and FODMAP analysis of the PIs by HPAEC-PAD, in g/100 g DM.

|          |                        | Lentil              | Oat         | BSGP        | Rice        | Wheat       |             |
|----------|------------------------|---------------------|-------------|-------------|-------------|-------------|-------------|
| Glucose  |                        | 0.11 ± 0.01         | 0.03 ± 0.01 | 0.29 ± 0.01 | 2.33 ± 0.02 | 0.28 ± 0.04 |             |
| Fructose |                        | 0.05 ± 0.01         | n.d.*       | 0.07 ± 0.00 | 0.34 ± 0.00 | 0.13 ± 0.00 |             |
| Sucrose  |                        | 1.01 ± 0.02         | 0.77 ± 0.00 | 0.01 ± 0.00 | 0.2 ± 0.01  | 0.06 ± 0.00 |             |
| EF**     |                        | -                   | -           | -           | -           | -           |             |
| FODMAPs  | Polyols                | Xylitol             | 0.02 ± 0.00 | n.d.        | n.d.        | 0.01 ± 0.00 | n.d.        |
|          |                        | Sorbitol            | 0.01 ± 0.00 | n.d.        | n.d.        | 0.09 ± 0.00 | 0.21 ± 0.00 |
|          |                        | Mannitol            | 0.62 ± 0.01 | n.d.        | n.d.        | 0.01 ± 0.00 | 0.03 ± 0.00 |
|          |                        | ∑ Polyols           | 0.65 ± 0.01 | n.d.        | n.d.        | 0.11 ± 0.01 | 0.24 ± 0.00 |
|          | Oligo-saccharides (OS) | Raffinose/Stachyose | 2.01 ± 0.03 | 0.17 ± 0.00 | n.d.        | 0.02 ± 0.00 | 0.01 ± 0.00 |
|          |                        | Verbascose          | 0.43 ± 0.01 | 0.01 ± 0.00 | n.d.        | n.d.        | n.d.        |
|          |                        | Fructans            | -†          | n.d.        | 0.14 ± 0.05 | n.d.        | 0.67 ± 0.03 |
|          |                        | ∑ OS                | 2.44 ± 0.03 | 0.18 ± 0.00 | 0.14 ± 0.05 | 0.02 ± 0.00 | 0.68 ± 0.03 |
|          | ∑ FODMAPs              |                     | 3.09 ± 0.03 | 0.18 ± 0.00 | 0.14 ± 0.05 | 0.13 ± 0.00 | 0.92 ± 0.00 |

\*n.d., not detected or levels below 0.0005 g / 100 g DM. \*\*Fructose in excess of glucose. †Fructans not determined as they are not present in legumes.

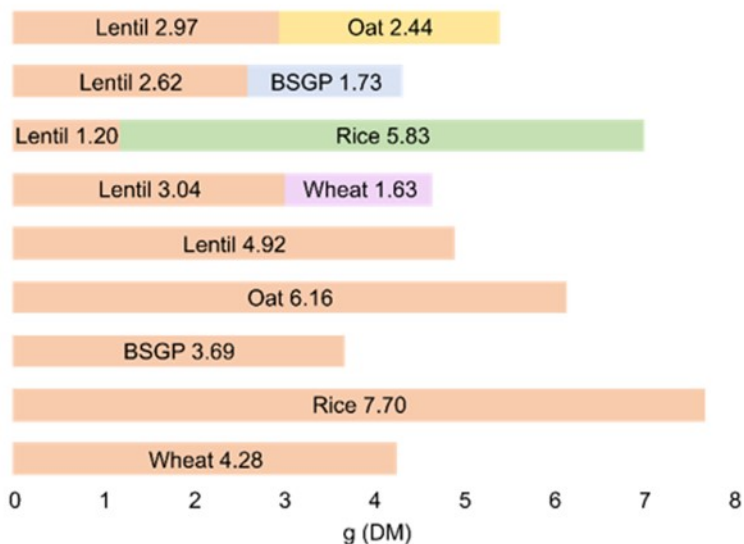

Supplementary Figure 1 Amount of PI (g DM) per 100 g emulsion in single-ingredient and blended emulsions.

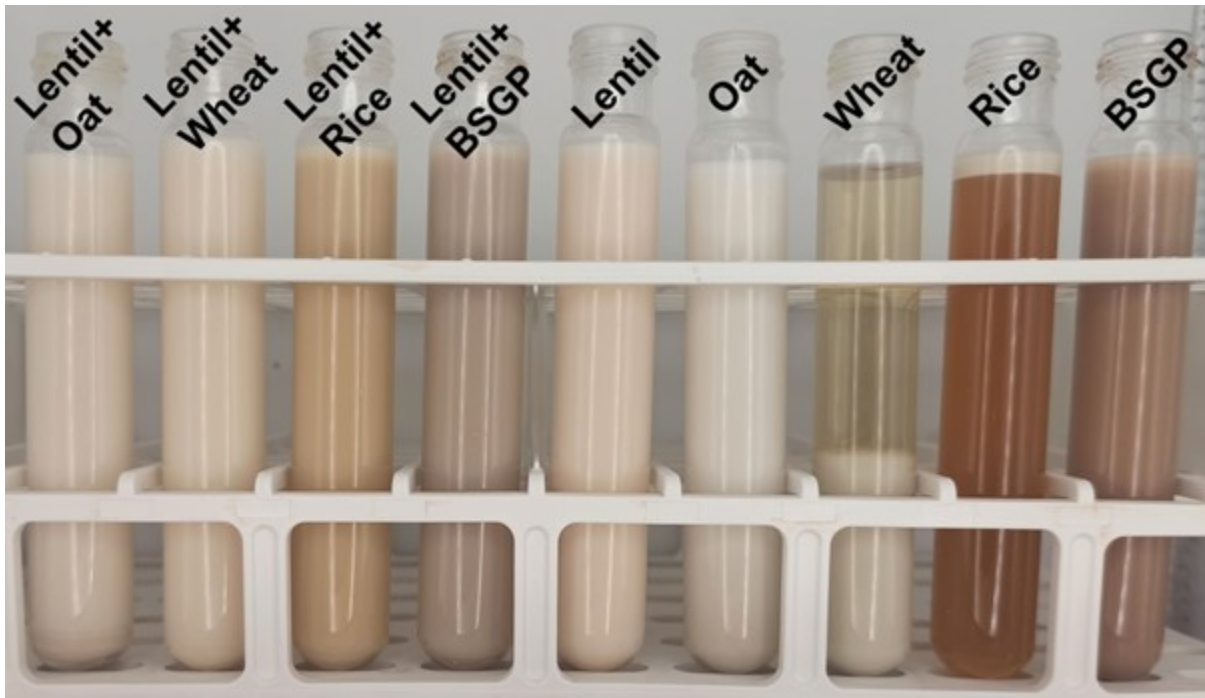

Supplementary Figure 2 Photographs of PBMA based on combined and single ingredients after 24h of storage.
