# Supplementary figures and images for: Protein digestibility and techno-functional performance of milk-alternative prototypes based on combinations of lentil and cereal protein
Source: Royal Society of Chemistry journal article supplement (doi:10.1039/d4fo04103h), 2024-01-01

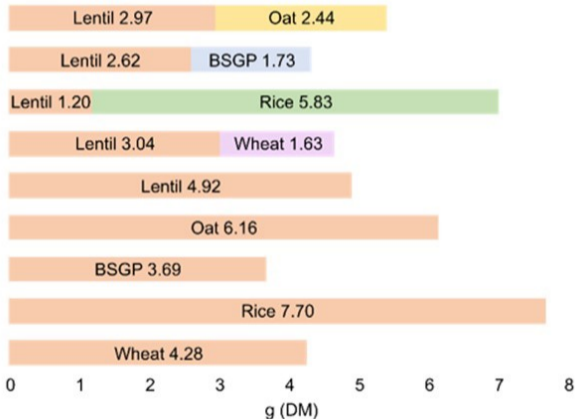

Supplement: d4fo04103h2.pdf [file d4fo04103h2.pdf]

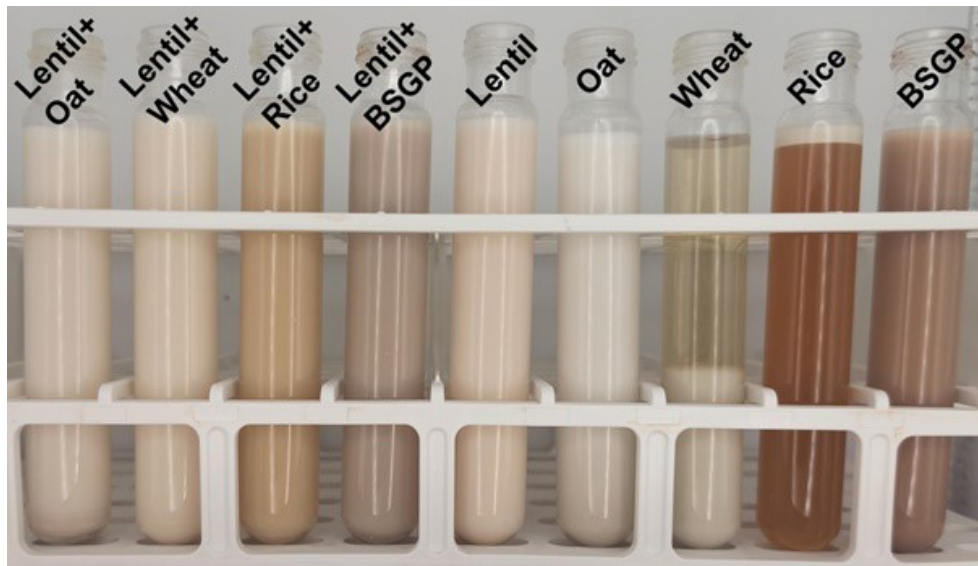

Supplement: d4fo04103h3.pdf [file d4fo04103h3.pdf]
